# Supplementary material for: Side effects by oral application of atmospheric pressure plasma on the mucosa in mice
Source: PubMed Central journal article supplement (PMC6456225; doi:10.1371/journal.pone.0215099), 2019-04-09
Supplement: pone.0215099.s001.pdf [file pone.0215099.s001.pdf]

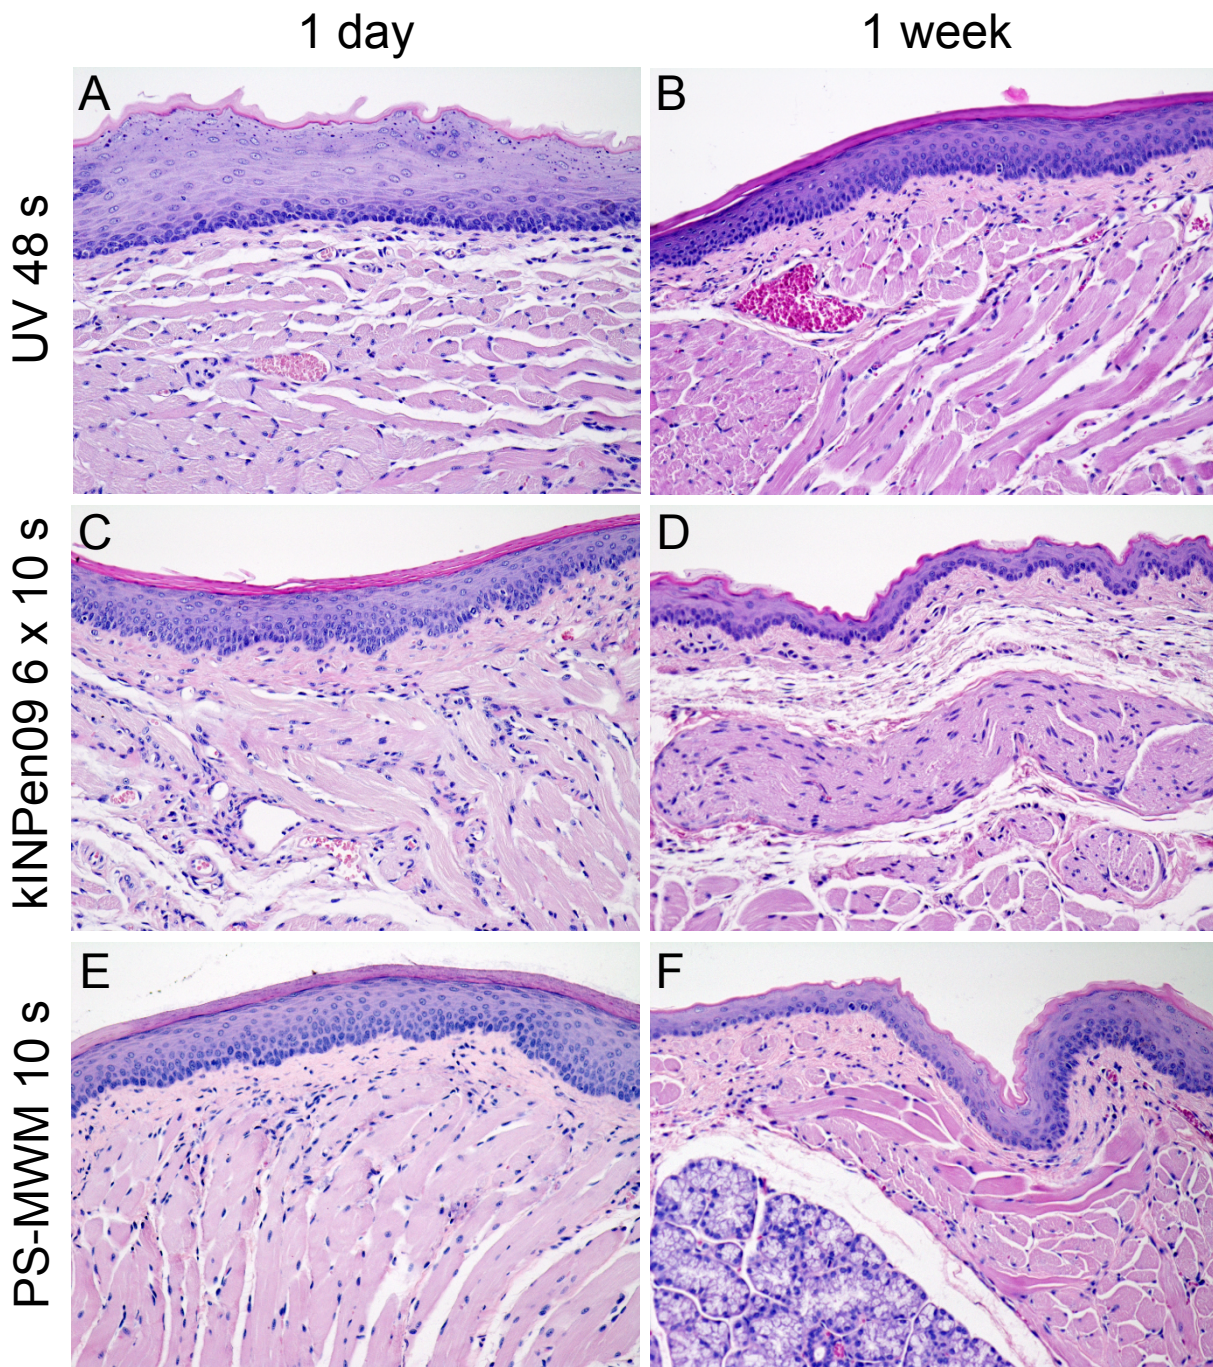

**S1 Fig. Histological examinations of untreated left sided cheek mucosa.** The untreated left oral cheek mucosa did not show any alterations in all groups, here exemplary shown for the treatment with UV 48 s (A,B), kinPen09 6x10s (C,D) and PS-MWM 10s (E,F) (A - F HE, original magnification 200-fold, A,C,E one day after treatment, B,D,F one week after treatment).
